# Supplementary material for: A Combined Risk Score Model to Assess Prognostic Value in Patients with Soft Tissue Sarcomas
Source: MDPI journal article supplement (doi:10.3390/cells11244077), 2022-12-16
Supplement: s1 [file s1]

**Supplementary Table S1**

The WGCNA was performed on TCGA-SARC to study the hub genes.

| Gene   | Coef         |
|--------|--------------|
| LIPT1  | -0.479559011 |
| GCSH   | 0.368286205  |
| ATP7B  | 0.119080216  |
| NCOA6  | 0.177100002  |
| PRPF4B | 0.335911194  |

Note: The signature genes was used for constructing LASSO regression.

**Supplementary Table S2**

Patient Characteristics

| Characteristics                                          | Patients |       |
|----------------------------------------------------------|----------|-------|
|                                                          | n        | (%)   |
| Age, year                                                |          |       |
| < 50                                                     | 15       | 45.45 |
| > 50                                                     | 18       | 54.55 |
| Sex                                                      |          |       |
| Male                                                     | 19       | 57.58 |
| Female                                                   | 14       | 42.42 |
| Site                                                     |          |       |
| Extremities                                              | 24       | 72.73 |
| Head, neck                                               | 2        | 6.06  |
| Trunk wall                                               | 4        | 12.12 |
| Internal trunk*                                          | 3        | 9.09  |
| Tumor size (cm)                                          |          |       |
| < 5                                                      | 9        | 27.27 |
| 5 < S < 10                                               | 10       | 30.30 |
| >= 10                                                    | 14       | 42.42 |
| Tumor depth                                              |          |       |
| Superficial                                              | 8        | 24.24 |
| Deep                                                     | 25       | 75.76 |
| TNM classification                                       |          |       |
| I                                                        | 8        | 24.24 |
| II                                                       | 5        | 15.15 |
| III                                                      | 16       | 48.48 |
| IV                                                       | 4        | 12.12 |
| Retroperitoneal space,<br>ntraabdominal area, and pelvis |          |       |

**Supplementary Table S3**

The primer sequences of genes.

| Gene Name | Forward (5' - 3')       | Reverse (5' - 3')       |
|-----------|-------------------------|-------------------------|
| FDX1      | TTCAACCTGTCACCTCATCTTTG | TGCCAGATCGAGCATGTCATT   |
| LIPT1     | CCTCTGTTGTAATTGGTAGGCAT | CTGGGGTTGGACAGCATTCAG   |
| LIAS      | CAGCCCAGTCAGACCGTTAAG   | TTTCTGGCGTTTTAGGTTTCCT  |
| DLD       | CTCATGGCCTACAGGGACTTT   | GCATGTTCCACCAAGTGTTTCAT |
| DBT       | CAGTTCGCCGTCTGGCAAT     | CCTGTGAATAACCGGAGGTTTTG |
| GSCH      | GAACGTCCCATCAGTACTACAT  | TTCTGAAGGGTTACTCAGTGTC  |
| DLST      | GAAGTCCCCTCTAGGGAGAC    | AACCTTCCTGCTGTTAGGGTA   |
| DLAT      | CCGCCGCTATTACAGTCTTCC   | CTCTGCAATTAGGTCACCTTCAT |
| PDHA1     | TGGTAGCATCCCGTAATTTTGC  | ATTCGGCGTACAGTCTGCATC   |
| PDHB      | AAGAGGCGCTTTCAGTGGAC    | ACTAACCTTGTATGCCCCATCA  |
| SLC31A1   | GGGGATGAGCTATATGGACTCC  | TCACCAAACCGGAAAACAGTAG  |
| ATP7B     | CGGTTTAGTGGATATTTTGTCCC | CTCTGAACAACACCAAAATCGA  |
| ATP7B     | GCCAGCATTGCAGAAGGAAAG   | TGATAAGTGATGACGGCCTCT   |
| NCOA6     | TACCAACGCAAATAAACCGAAG  | TTTAGGGCCTGAGTTATCCAAG  |
| PRPF4B    | CAGCATCTTTGTCTGGTATTCG  | CCAGGAACAACCTGCTGACTATA |
| GAPDH     | TATCGTGATGCTAGTCCGATG   | TGCAGCTAGCTGCATCGATCGG  |

**Supplementary Table S4**

The characteristic of 255 STS patients.

| Characteristics          |                              | High-risk<br>n=127 | Low-risk<br>n=128 | P value |
|--------------------------|------------------------------|--------------------|-------------------|---------|
| Age<br>(mean (SD))       |                              | 58.98<br>(15.77)   | 61.70<br>(12.70)  | 0.129   |
| Race (%)                 | Asian                        | 3 ( 2.4)           | 2 ( 1.6)          | 0.702   |
|                          | Black or african american    | 11 ( 8.7)          | 7 ( 5.5)          |         |
|                          | Not reported                 | 5 ( 3.9)           | 4 ( 3.1)          |         |
|                          | White                        | 108 (85.0)         | 115 (89.8)        |         |
| Gender (%)               | Female                       | 73 (57.5)          | 66 (51.6)         | 0.410   |
|                          | Male                         | 54 (42.5)          | 62 (48.4)         |         |
| Primary<br>diagnosis (%) | Abdominal fibromatosis       | 1 ( 0.8)           | 0 ( 0.0)          | 0.200   |
|                          | Aggressive fibromatosis      | 1 ( 0.8)           | 0 ( 0.0)          |         |
|                          | Dedifferentiated liposarcoma | 26 (20.5)          | 30 (23.4)         |         |

|                                  |                                            |           |           |       |
|----------------------------------|--------------------------------------------|-----------|-----------|-------|
|                                  | Fibromyxosarcoma                           | 12 ( 9.4) | 13 (10.2) |       |
|                                  | Giant cell sarcoma                         | 3 ( 2.4)  | 0 ( 0.0)  |       |
|                                  | Leiomyosarcoma, NOS                        | 41 (32.3) | 59 (46.1) |       |
|                                  | Liposarcoma, well differentiated           | 1 ( 0.8)  | 0 ( 0.0)  |       |
|                                  | Malignant fibrous histiocyoma              | 5 ( 3.9)  | 7 ( 5.5)  |       |
|                                  | Malignant peripheral nerve sheath tumor    | 7 ( 5.5)  | 2 ( 1.6)  |       |
|                                  | Myxoid leiomyosarcoma                      | 2 ( 1.6)  | 1 ( 0.8)  |       |
|                                  | Pleomorphic liposarcoma                    | 1 ( 0.8)  | 0 ( 0.0)  |       |
|                                  | Synovial sarcoma, biphasic                 | 2 ( 1.6)  | 0 ( 0.0)  |       |
|                                  | Synovial sarcoma, NOS                      | 1 ( 0.8)  | 1 ( 0.8)  |       |
|                                  | Synovial sarcoma, spindle cell             | 4 ( 3.1)  | 2 ( 1.6)  |       |
|                                  | Undifferentiated sarcoma                   | 20 (15.7) | 13 (10.2) |       |
| Metastatic diagnosis (%)         | Not reported                               | 35 (27.6) | 46 (35.9) | 0.129 |
|                                  | NO                                         | 58 (45.7) | 60 (46.9) |       |
|                                  | YES                                        | 34 (26.8) | 22 (17.2) |       |
| Tumor total necrosis percent (%) | Not reported                               | 34 (26.8) | 43 (33.6) | 0.689 |
|                                  | <10% (focal necrosis)                      | 21 (16.5) | 16 (12.5) |       |
|                                  | 0% (no necrosis or no mention of necrosis) | 36 (28.3) | 33 (25.8) |       |
|                                  | Extensive Necrosis (>50%)                  | 7 ( 5.5)  | 5 ( 3.9)  |       |
|                                  | Moderate Necrosis (>=10, <50%)             | 29 (22.8) | 31 (24.2) |       |
| Tumor depth (%)                  | Not reported                               | 28 (22.0) | 24 (18.8) | 0.686 |
|                                  | Deep                                       | 90 (70.9) | 92 (71.9) |       |
|                                  | Superficial                                | 9 ( 7.1)  | 12 ( 9.4) |       |

Note:  $P < 0.05$  was considered to be significant difference. STS: soft tissue sarcoma
